# Supplementary material for: Autoantibodies Targeting AT1- and ETA-Receptors Link Endothelial Proliferation and Coagulation via Ets-1 Transcription Factor
Source: MDPI journal article supplement (doi:10.3390/ijms23010244), 2021-12-27
Supplement: s1 [file s1]

## Online supplement

|                                    |             |
|------------------------------------|-------------|
| Supplementary Material and Methods | Page 1 to 3 |
| Supplementary Figures              | Page 4 to 5 |
| Supplementary Table S1             | Page 2      |
| Supplementary Table S2             | Page 2      |
| Supplementary Table S3             | Page 3      |
| Supplementary Table S4             | Page 6      |

## Supplementary Material and Methods

### RNA extraction and real-time RT-PCR

Primer sequences are reported in suppl. Table 1, all shown as 5'-3'.

|                                                  |                           |                             |
|--------------------------------------------------|---------------------------|-----------------------------|
| <b>Ets-1<br/>GenBank<br/>NM_001143820.1</b>      | <b>Forward<br/>primer</b> | ACCCAGCCTATCCAGAATCC        |
|                                                  | <b>Reverse<br/>primer</b> | ATGAAGCTGGGCTCTGAGAA        |
| <b>Tissue Factor<br/>GenBank<br/>NM_001993.4</b> | <b>Forward<br/>primer</b> | TGATGTGGATAAAGGAGAAACTACTGT |
|                                                  | <b>Reverse<br/>primer</b> | CTACCGGGCTGTCTGTACTCTTC     |

*Table S1 : Primer sequences for real-time PCR.*

### Reporter constructs and Luciferase assay

Human genomic DNA was amplified by PCR using a common reverse primer complementary to the DNA sequence 178 base pairs downstream of the translation start site in TF gene *F3* (Suppl. Table 2) and forward primers located -678, -495 or -242 bp upstream of the translation start site (Suppl. Table 2), all shown as 5'-3'.

|           |                                  |                                  |
|-----------|----------------------------------|----------------------------------|
| <i>F3</i> | <b>Forward primer<br/>[-678]</b> | TGATCAGGTACCGAGCCAACTGACCCTCAGAC |
|           | <b>Forward primer<br/>[-495]</b> | TGATCAGGTACCACGTTTACTTCGCTGCAGGT |
|           | <b>Forward primer<br/>[-242]</b> | TGATCAGGTACCGACCCGGGCAACTAGACC   |
|           | <b>Reverse primer</b>            | CAGGCAGAGCTCGCAGGGGTCTCCATGTCTAC |

*Table S2 : Primer sequences for promoter luciferase reporter assays.*

### Nuclear extracts and Electrophoretic Mobility Shift Assay (EMSA)

For EMSA, we used an Ets-1 [5'-TGGGCAAAGCATCCGGGAAATGCC-3'] probe (-475 to -498 from translation start).

### Chromatin immunoprecipitation assay (ChIP)

Primer sequences listed in suppl. Table 3 were used, all shown as 5'-3'.

|                                   |          |                       |                       |
|-----------------------------------|----------|-----------------------|-----------------------|
| Specific Tissue<br>Factor primers | Positive | <b>Forward primer</b> | AGAGGCAAACCTGCCAGATGT |
|                                   |          | <b>Reverse primer</b> | TGTCTACCAGTTGGCGGAGG  |
|                                   | Negative | <b>Forward primer</b> | GAATCACATCCCAGGTGGAG  |
|                                   |          | <b>Reverse primer</b> | GAAGCAGAAAGTTGCCCTTG  |

*Table S3: Primer sequences for CHIP.*

## Supplementary figures

### Suppl. Figure S1

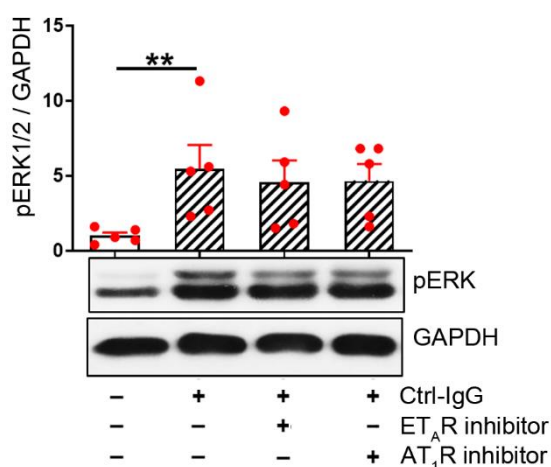

**Legend Figure S1.** ERK1/2 activation (phosphorylation) after stimulation with IgG isolated from healthy individuals (Ctrl-IgG). HMEC-1 were stimulated 15 minutes with Ctrl-IgG and specificity was assessed via one-hour pre-incubation AT<sub>1</sub>R or ET<sub>A</sub>R inhibitors (Valsartan and Sitaxsentan, respectively). Data derived from five experiments.

### Suppl. Figure S2

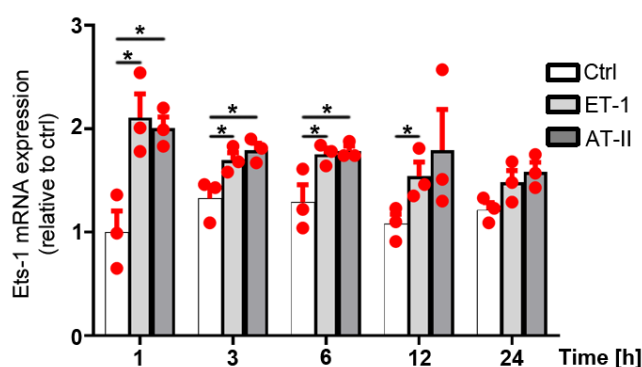

**Legend Figure S2.** Transcriptional regulation of Ets-1 after stimulation with Endothelin-1 (ET-1) or Angiotensin II (AT-II). Non-stimulated cells were used as control. HMEC-1 were stimulated for increasing time. Data derived from three experiments.

### Suppl. Figure S3

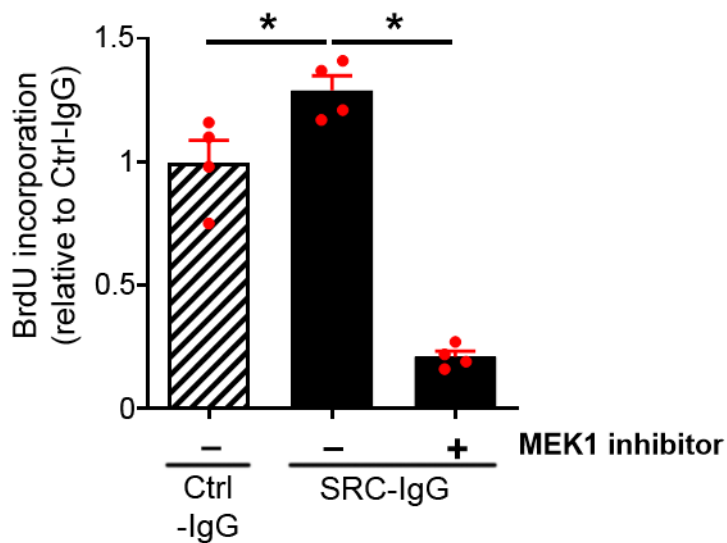

**Legend Figure S3.** *Endothelial cell proliferation triggered by SRC-IgG via ERK1/2 – Ets-1 signalling. Ctrl-IgG-stimulated cells were used as control. HMEC-1 were stimulated 24 hours and specificity was assessed via two-hour pre-incubation MEK1 inhibitor. Data derived from four experiments.*

### Suppl. Figure S4

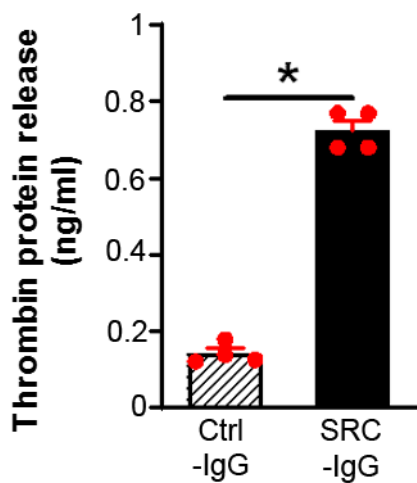

**Legend Figure S4.** *Thrombin protein release after stimulation with Ctrl- or SRC-IgG. HMEC-1 were stimulated 24 hours. Data derived from four experiments.*

|                                |                                                     | 1       | 2       | 3          | 4       | median (min-max)<br>frequency (%) |
|--------------------------------|-----------------------------------------------------|---------|---------|------------|---------|-----------------------------------|
| <b>Patient characteristics</b> | <b>Patient no.</b>                                  |         |         |            |         |                                   |
|                                | <b>age [years]</b>                                  | 47      | 52      | 47         | 68      | 49.5 (47-68)                      |
|                                | <b>sex</b>                                          | f       | f       | f          | f       | 4/4 (100%) female                 |
|                                | <b>disease duration [month]</b>                     | 91      | 91      | 70         | 5       | 80.5 (5-91)                       |
|                                | <b>diffuse/limited SSc</b>                          | limited | diffuse | diffuse    | diffuse | 3/4 (75%) diffuse                 |
|                                | <b>antibodies</b>                                   | -       | Scl-70  | Scl-70     | Scl-70  | 3/4 (75%) Scl-70 pos.             |
|                                | <b>mean AT<sub>1</sub>R-IgG level [U/mL]</b>        | 16.94   | 23.77   | 29.89      | 15.45   | 20.36 (15.45-29.89)               |
|                                | <b>mean ET<sub>A</sub>R-IgG level [U/mL]</b>        | 17.00   | 28.15   | 32.14      | 15.96   | 22.58 (15.96-32.14)               |
| <b>Clinical presentation</b>   | <b>hypertensive (<math>\geq 140/85</math> mmHg)</b> | +       | -       | +          | -       | 2/4 (50%)                         |
|                                | <b>systolic [mmHg]</b>                              | >300    | 90      | 220        | 120     | 170 (90->300)                     |
|                                | <b>diastolic [mmHg]</b>                             | 140     | 60      | 100        | 85      | 92.5 (60-140)                     |
|                                | <b>initial kidney function/creatinine [mg/dL]</b>   | 3.64    | 4.68    | anuria, HD | 4.00    | 1/4 (25%) HD; 4.00 (3.64-4.68)    |
| <b>Histology</b>               | <b>preglomerular TMA</b>                            | +       | +       | -          | -       | 2/4 (50%)                         |
|                                | <b>glomerular TMA</b>                               | +       | +       | -          | -       | 2/4 (50%)                         |
|                                | <b>fibrinoid necrosis</b>                           | +       | +       | -          | -       | 2/4 (50%)                         |
|                                | <b>myxoid intimal deposition</b>                    | +       | +       | +          | -       | 3/4 (75%)                         |
|                                | <b>concentric intimal sclerosis</b>                 | +       | +       | +          | +       | 4/4 (100%)                        |
|                                | <b>IF/TA</b>                                        | 20%     | 20%     | <5%        | 15%     | 3/4 (75%)                         |

*Table S4: Demographical characteristics.*

f - female; Scl-70 – anti-topoisomerase I; TMA - thrombotic microangiopathy; IF/TA - interstitial fibrosis/tubular atrophy
